# Supplementary material
Source: publisher figshare collection journal article supplement (https://diabetesjournals.figshare.com/articles/dataset/_/24726048)
Supplement: Supplementary file 1 [file 1]

Nicholas Becker, Kyla Best, Carissa Birzniece, Michelle Bui, Diego Carrasco, Daniel Casillas, Maureen Flynn, Audrey Gruscynski, Lucy Hall, Madeline Harbour, Melissa Leroux, Kelly Nash, Nhung Nguyen, Emily Sell, Callyn Rountree-Jablin
