# Supplementary material
Source: publisher figshare collection journal article supplement (https://diabetesjournals.figshare.com/articles/dataset/_/24726048)
Supplement: Supplementary file 2 [file 1]

**Supplemental Table 1 Intraglomerular hemodynamic function, MRI, DXA, and hyperglycemic clamp measures by albuminuria in youth with type 2 diabetes**

|                                                    | Normoalbuminuria<br>(N=35) | Elevated albuminuria<br>(N=15) | p value |
|----------------------------------------------------|----------------------------|--------------------------------|---------|
| <b><i>Anthropometrics</i></b>                      |                            |                                |         |
| BMI (kg/m <sup>2</sup> )                           | 34.9 ± 7.5                 | 40.4 ± 5.6                     | 0.016   |
| Weight (kg)                                        | 99.8 ± 24.5                | 114.4 ± 22.1                   | 0.059   |
| Height (cm)                                        | 167.8 ± 9.0                | 168.8 ± 7.7                    | 0.691   |
| <b><i>Intraglomerular hemodynamic function</i></b> |                            |                                |         |
| GFR (mL/min)                                       | 207 ± 58                   | 213 ± 77                       | 0.755   |
| GFR (mL/min/1.73m <sup>2</sup> )                   | 166 ± 39                   | 155 ± 48                       | 0.440   |
| RPF (mL/min)                                       | 833 ± 180                  | 921 ± 117                      | 0.142   |
| RPF (mL/min/1.73m <sup>2</sup> )                   | 663 ± 115                  | 661 ± 74                       | 0.950   |
| FF (%)                                             | 25 ± 7                     | 22 ± 5                         | 0.163   |
| P <sub>GLO</sub> (mmHg)                            | 79 ± 11                    | 79 ± 11                        | 0.938   |
| R <sub>A</sub> (dyne·s·cm <sup>-5</sup> )          | 866 ± 379                  | 859 ± 780                      | 0.972   |
| R <sub>E</sub> (dyne·s·cm <sup>-5</sup> )          | 2301 [1900, 2464]          | 1894 [1596, 2222]              | 0.097   |
| RVR (mm Hg/L/min·1000)                             | 0.07 ± 0.01                | 0.06 ± 0.01                    | 0.043   |
| <b><i>Multiparametric kidney MRI</i></b>           |                            |                                |         |
| Left cortex 3D ASL (mL/min/100g)                   | 212.4 ± 56.0               | 203.3 ± 34.5                   | 0.667   |
| Right cortex 3D ASL (mL/min/100g)                  | 223.5 ± 45.3               | 224.8 ± 50.6                   | 0.943   |
| Average cortex 3D ASL (mL/min/100g)                | 218.6 ± 49.3               | 215.1 ± 38.6                   | 0.841   |
| Left cortex R2* (s <sup>-1</sup> )                 | 18.3 ± 1.3                 | 17.5 ± 0.9                     | 0.060   |
| Right cortex R2* (s <sup>-1</sup> )                | 17.5 ± 1.6                 | 18.6 ± 3.4                     | 0.147   |
| Average cortex R2* (s <sup>-1</sup> )              | 17.9 ± 1.2                 | 18.4 ± 2.8                     | 0.413   |
| Left medulla R2* (s <sup>-1</sup> )                | 25.0 ± 3.1                 | 23.8 ± 3.0                     | 0.315   |
| Right medulla R2* (s <sup>-1</sup> )               | 23.9 ± 2.6                 | 24.8 ± 3.9                     | 0.391   |
| Average medulla R2* (s <sup>-1</sup> )             | 24.4 ± 2.7                 | 24.7 ± 3.9                     | 0.707   |
| Left FSOC medulla (%)                              | 5.4 ± 3.2                  | 4.8 ± 4.1                      | 0.641   |
| Right FSOC medulla (%)                             | 5.2 ± 2.3                  | 4.8 ± 3.0                      | 0.645   |
| Average FSOC medulla (%)                           | 5.3 ± 2.6                  | 4.7 ± 3.3                      | 0.600   |
| <b><i>DXA</i></b>                                  |                            |                                |         |
| Lean mass (kg)                                     | 54.4 ± 10.4                | 59.6 ± 12.3                    | 0.142   |
| Fat mass (kg)                                      | 39.5 ± 14.6                | 52.7 ± 11.3                    | 0.004   |
| Body fat percentage (%)                            | 41.5 ± 7.0                 | 46.7 ± 4.6                     | 0.013   |
| Trunk mass (kg)                                    | 46.0 ± 12.8                | 56.9 ± 10.8                    | 0.007   |
| <b><i>Hyperglycemic clamp measures</i></b>         |                            |                                |         |
| Fasting FFA                                        | 693.6 ± 197.7              | 772.5 ± 239.0                  | 0.312   |
| FFA suppression (%)                                | 72.1 [45.2, 91.6]          | 38.7 [24.5, 71.0]              | 0.066   |
| Fasting insulin (pM)                               | 14.5 [8.5, 21.0]           | 22.0 [15.4, 31.3]              | 0.045   |
| Steady state insulin (pM)                          | 205.5 [85.5, 379.5]        | 282.8 [76.5, 421.1]            | 0.780   |
| Steady state C-peptide (nM)                        | 7.8 ± 4.2                  | 9.0 ± 5.6                      | 0.438   |
| Raw M-value (mg/kg lean/min)                       | 4.0 ± 2.9                  | 2.6 ± 1.9                      | 0.110   |
| M/I (mg/kg lean/min) / (pM)                        | 0.015 [0.009, 0.029]       | 0.009 [0.002, 0.013]           | 0.016   |
| DI (x10 <sup>3</sup> mg/kg lean/min)               | 0.8 [0.1, 2.0]             | 0.07 [0.0, 0.7]                | 0.031   |
| AIRg (pM)                                          | 40.0 [0.0, 118.2]          | 15.6 [0.0, 72.0]               | 0.259   |
| ACPRg (nM)                                         | 0.7 [0.3, 1.5]             | 0.5 [0.0, 0.8]                 | 0.336   |

Continuous variables are shown as means ± standard deviations or median and 25<sup>th</sup>, 75<sup>th</sup> percentiles in square brackets. Categorical variables are shown as counts and percentages in parentheses.

Abbreviations: GFR, glomerular filtration rate; RPF, effective renal plasma flow; FF, filtration fraction; P<sub>GLO</sub>, glomerular pressure; R<sub>A</sub>, afferent arteriolar resistance; R<sub>E</sub>, efferent arteriolar resistance; RVR, renal vascular resistance; MRI, magnetic resonance imaging; TKV, total kidney volume, 3D ASL, 3-dimensional arterial spin labeling; ADC, afferent diffusion coefficient; FSOC, furosemide-induced suppression of oxygen consumption; DXA, dual-energy X-ray absorptiometry; FFA, free fatty acid; M/I, insulin sensitivity index (M-value/mean insulin concentration); DI, disposition index; AIRg, acute insulin response to glucose; ACPRg, acute C-peptide response to glucose.

**Supplemental Table 2 Intraglomerular hemodynamic function, MRI, DXA, and hyperglycemic clamp measures by hyperfiltration (by mGFR) in youth with type 2 diabetes**

|                                                    | No hyperfiltration<br>(N=22) | Hyperfiltration<br>(N=26) | p value |
|----------------------------------------------------|------------------------------|---------------------------|---------|
| <b><i>Anthropometrics</i></b>                      |                              |                           |         |
| BMI (kg/m <sup>2</sup> )                           | 35.6 ± 6.8                   | 37.1 ± 8.0                | 0.493   |
| Weight (kg)                                        | 100.8 ± 22.0                 | 106.3 ± 27.0              | 0.446   |
| Height (cm)                                        | 168.0 ± 8.1                  | 168.7 ± 8.2               | 0.775   |
| <b><i>Intraglomerular hemodynamic function</i></b> |                              |                           |         |
| GFR (mL/min)                                       | 163 ± 33                     | 250 ± 55                  | < 0.001 |
| GFR (mL/min/1.73m <sup>2</sup> )                   | 128 ± 21                     | 193 ± 30                  | < 0.001 |
| RPF (mL/min)                                       | 808 ± 129                    | 904 ± 190                 | 0.068   |
| RPF (mL/min/1.73m <sup>2</sup> )                   | 636 ± 92                     | 689 ± 112                 | 0.105   |
| FF (%)                                             | 21 ± 5                       | 28 ± 6                    | < 0.001 |
| P <sub>GLO</sub> (mmHg)                            | 72 ± 8                       | 86 ± 9                    | < 0.001 |
| R <sub>A</sub> (dyne·s·cm <sup>-5</sup> )          | 1032 ± 535                   | 626 ± 344                 | 0.018   |
| R <sub>E</sub> (dyne·s·cm <sup>-5</sup> )          | 1731 [1503, 2040]            | 2391 [2276, 2483]         | < 0.001 |
| RVR (mm Hg/L/min·1000)                             | 0.07 ± 0.01                  | 0.06 ± 0.02               | 0.791   |
| <b><i>Multiparametric kidney MRI</i></b>           |                              |                           |         |
| Average cortex 3D ASL (mL/min/100g)                | 218.6 ± 57.2                 | 215.2 ± 35.2              | 0.832   |
| Average cortex R2* (s <sup>-1</sup> )              | 18.3 ± 2.1                   | 17.9 ± 1.3                | 0.535   |
| Average medulla R2* (s <sup>-1</sup> )             | 25.6 ± 3.0                   | 23.5 ± 2.9                | 0.023   |
| Average FSOC medulla (%)                           | 5.7 ± 2.8                    | 4.6 ± 2.8                 | 0.218   |
| <b><i>DXA</i></b>                                  |                              |                           |         |
| Lean mass (kg)                                     | 55.4 ± 8.2                   | 57.0 ± 13.5               | 0.639   |
| Fat mass (kg)                                      | 40.7 ± 15.2                  | 46.1 ± 14.6               | 0.229   |
| Body fat percentage (%)                            | 42.0 ± 7.7                   | 43.8 ± 5.6                | 0.354   |
| Trunk mass (kg)                                    | 46.9 ± 13.1                  | 51.7 ± 13.2               | 0.234   |
| <b><i>Hyperglycemic clamp measures</i></b>         |                              |                           |         |
| Fasting FFA (μM)                                   | 698.9 ± 218.1                | 728.2 ± 205.1             | 0.673   |
| FFA suppression (%)                                | 66.2 [44.6, 91.8]            | 67.6 [32.8, 79.9]         | 0.438   |
| Fasting insulin (pM)                               | 17.8 [7.6, 22.2]             | 16.5 [9.0, 29.0]          | 0.685   |
| Steady state insulin (pM)                          | 190.5 [82.1, 419.2]          | 235.5 [82.5, 387.0]       | 0.717   |
| Steady state C-peptide (nM)                        | 8.6 ± 5.1                    | 7.7 ± 4.1                 | 0.520   |
| Raw M-value (mg/kg lean/min)                       | 4.2 ± 3.1                    | 3.1 ± 2.2                 | 0.168   |
| M/I (mg/kg lean/min) / (pM)                        | 0.011 [0.005, 0.021]         | 0.012 [0.007, 0.022]      | 0.783   |
| DI (x10 <sup>3</sup> mg/kg lean/min)               | 0.8 [0.0, 1.9]               | 0.3 [0.0, 1.4]            | 0.599   |
| AI <sub>Rg</sub> (pM)                              | 30.0 [0.0, 97.2]             | 33.6 [0.0, 118.2]         | 0.796   |
| ACPR <sub>g</sub> (nM)                             | 0.6 [0.3, 1.2]               | 0.6 [0.2, 1.5]            | 1.000   |

Two participants were excluded from this table due to missing mGFR data.

Continuous variables are shown as means ± standard deviations or median and 25<sup>th</sup>, 75<sup>th</sup> percentiles in square brackets. Categorical variables are shown as counts and percentages in parentheses.

Abbreviations: GFR, glomerular filtration rate; RPF, effective renal plasma flow; FF, filtration fraction; P<sub>GLO</sub>, glomerular pressure; R<sub>A</sub>, afferent arteriolar resistance; R<sub>E</sub>, efferent arteriolar resistance; RVR, renal vascular resistance; MRI, magnetic resonance imaging; TKV, total kidney volume, 3D ASL, 3-dimensional arterial spin labeling; ADC, afferent diffusion coefficient; FSOC, furosemide-induced suppression of oxygen consumption; DXA, dual-energy X-ray absorptiometry; FFA, free fatty acid; M/I, insulin sensitivity index (M-value/mean insulin concentration); DI, disposition index; AI<sub>Rg</sub>, acute insulin response to glucose; ACPR<sub>g</sub>, acute C-peptide response to glucose.

**Supplemental Table 3 MRI measures by group**

|                                          | Controls in<br>Normal Weight<br>Category<br>(N=20) | Controls with<br>Obesity<br>(N=21) | Youth with<br>Type 2<br>Diabetes<br>(N=50) | Pairwise<br>difference <sup>†</sup> | p value |
|------------------------------------------|----------------------------------------------------|------------------------------------|--------------------------------------------|-------------------------------------|---------|
| <b><i>Multiparametric kidney MRI</i></b> |                                                    |                                    |                                            |                                     |         |
| Left cortex 3D ASL<br>(mL/min/100g)      | 192.1 ± 52.4                                       | 190.4 ± 40.5                       | 210.3 ± 51.6                               | -                                   | 0.278   |
| Right cortex 3D ASL<br>(mL/min/100g)     | 201.7 ± 56.2                                       | 199.6 ± 47.3                       | 223.9 ± 46.1                               | -                                   | 0.127   |
| Average cortex 3D ASL<br>(mL/min/100g)   | 196.9 ± 53.4                                       | 195.6 ± 45.7                       | 217.7 ± 46.2                               | -                                   | 0.158   |
| Left cortex R2* (s <sup>-1</sup> )       | 22.2 ± 2.6                                         | 19.1 ± 2.0                         | 18.1 ± 1.3                                 | NT*, NO*                            | < 0.001 |
| Right cortex R2* (s <sup>-1</sup> )      | 20.4 ± 2.4                                         | 18.8 ± 2.6                         | 17.8 ± 2.3                                 | NT*                                 | < 0.001 |
| Average cortex R2* (s <sup>-1</sup> )    | 21.2 ± 2.3                                         | 18.9 ± 2.2                         | 18.0 ± 1.8                                 | NT*, NO                             | < 0.001 |
| Left medulla R2* (s <sup>-1</sup> )      | 29.3 ± 3.4                                         | 25.0 ± 3.2                         | 24.7 ± 3.1                                 | NT*, NO*                            | < 0.001 |
| Right medulla R2* (s <sup>-1</sup> )     | 26.6 ± 3.1                                         | 24.2 ± 2.9                         | 24.2 ± 3.0                                 | NT, NO                              | 0.008   |
| Average medulla R2* (s <sup>-1</sup> )   | 27.8 ± 3.0                                         | 24.6 ± 2.8                         | 24.5 ± 3.1                                 | NT*, NO                             | < 0.001 |
| Left FSOC medulla (%)                    | 6.3 ± 2.5                                          | 3.4 ± 2.3                          | 5.3 ± 3.4                                  | NO                                  | 0.018   |
| Right FSOC medulla (%)                   | 5.3 ± 2.2                                          | 3.4 ± 2.1                          | 5.1 ± 2.5                                  | OT, NO                              | 0.024   |
| Average FSOC medulla (%)                 | 5.7 ± 1.9                                          | 3.4 ± 1.9                          | 5.1 ± 2.8                                  | NO                                  | 0.014   |

Continuous variables are shown as means ± standard deviations or median and 25<sup>th</sup>, 75<sup>th</sup> percentiles in square brackets. Categorical variables are shown as counts and percentages in parentheses.

Abbreviations: 3D ASL, 3-dimensional arterial spin labeling; FSOC, furosemide-induced suppression of oxygen consumption.

<sup>†</sup>Pair abbreviations are shown if pairwise test is significant at p<0.05. Pairwise abbreviations: OT, controls with obesity versus youth with type 2 diabetes; NT, controls in normal weight category versus youth with type 2 diabetes; NO, controls in normal weight category versus controls with obesity. \*p < 0.001.

**Supplemental Table 4 Correlation coefficients with all participants combined**

|                                | GFR                        | RPF                        | P <sub>GLO</sub>           | RVR                        | Average cortex R2*         | Average medulla R2*        | Average FSOC medulla       |
|--------------------------------|----------------------------|----------------------------|----------------------------|----------------------------|----------------------------|----------------------------|----------------------------|
| Lean mass (%)                  | -0.437<br><i>&lt;0.001</i> | -0.484<br><i>&lt;0.001</i> | -0.453<br><i>&lt;0.001</i> | 0.331<br><i>0.006</i>      | 0.469<br><i>&lt;0.001</i>  | 0.496<br><i>&lt;0.001</i>  | 0.346<br><i>0.002</i>      |
| Fat mass (kg)                  | 0.623<br><i>&lt;0.001</i>  | 0.730<br><i>&lt;0.001</i>  | 0.519<br><i>&lt;0.001</i>  | -0.614<br><i>&lt;0.001</i> | -0.441<br><i>&lt;0.001</i> | -0.480<br><i>&lt;0.001</i> | -0.508<br><i>&lt;0.001</i> |
| Body fat (%)                   | 0.434<br><i>&lt;0.001</i>  | 0.490<br><i>&lt;0.001</i>  | 0.414<br><i>&lt;0.001</i>  | -0.352<br><i>0.003</i>     | -0.463<br><i>&lt;0.001</i> | -0.499<br><i>&lt;0.001</i> | -0.373<br><i>&lt;0.001</i> |
| Trunk mass (kg)                | 0.695<br><i>&lt;0.001</i>  | 0.738<br><i>&lt;0.001</i>  | 0.611<br><i>&lt;0.001</i>  | -0.625<br><i>&lt;0.001</i> | -0.424<br><i>&lt;0.001</i> | -0.442<br><i>&lt;0.001</i> | -0.539<br><i>&lt;0.001</i> |
| Urine Albumin-Creatinine Ratio | -0.016<br><i>0.885</i>     | 0.131<br><i>0.273</i>      | 0.260<br><i>0.029</i>      | -0.048<br><i>0.694</i>     | -0.181<br><i>0.095</i>     | -0.145<br><i>0.185</i>     | -0.091<br><i>0.418</i>     |
| HbA1C (%)                      | 0.260<br><i>0.015</i>      | 0.387<br><i>&lt;0.001</i>  | 0.616<br><i>&lt;0.001</i>  | -0.293<br><i>0.014</i>     | -0.438<br><i>&lt;0.001</i> | -0.378<br><i>&lt;0.001</i> | 0.001<br><i>0.994</i>      |
| Average cortex R2*             | -0.420<br><i>&lt;0.001</i> | -0.267<br><i>0.027</i>     | -0.450<br><i>&lt;0.001</i> | 0.275<br><i>0.025</i>      | 1.000<br><i>&lt;0.001</i>  | 0.684<br><i>&lt;0.001</i>  | 0.203<br><i>0.069</i>      |
| Average medulla R2*            | -0.406<br><i>&lt;0.001</i> | -0.252<br><i>0.038</i>     | -0.366<br><i>0.002</i>     | 0.228<br><i>0.065</i>      | 0.684<br><i>&lt;0.001</i>  | 1.000<br><i>&lt;0.001</i>  | 0.623<br><i>&lt;0.001</i>  |
| Average FSOC medulla           | -0.33<br><i>0.003</i>      | -0.289<br><i>0.021</i>     | -0.191<br><i>0.134</i>     | 0.213<br><i>0.097</i>      | 0.203<br><i>0.069</i>      | 0.623<br><i>&lt;0.001</i>  | 1.000<br><i>&lt;0.001</i>  |

Abbreviations: GFR, glomerular filtration rate; RPF, effective renal plasma flow; P<sub>GLO</sub>, glomerular pressure; RVR, renal vascular resistance; FSOC, furosemide-induced suppression of oxygen consumption; HbA1c: glycated hemoglobin.

**Supplemental Table 5 Correlation coefficients limited to youth with type 2 diabetes and controls with obesity**

|                        | GFR                       | RPF                       | P <sub>GLO</sub>       | RVR                        | Average cortex R2*        | Average medulla R2*       | Average FSOC medulla       |
|------------------------|---------------------------|---------------------------|------------------------|----------------------------|---------------------------|---------------------------|----------------------------|
| Lean mass (%)          | -0.184<br><i>0.139</i>    | -0.204<br><i>0.139</i>    | -0.101<br><i>0.465</i> | -0.035<br><i>0.808</i>     | 0.118<br><i>0.360</i>     | 0.337<br><i>0.008</i>     | 0.351<br><i>0.007</i>      |
| Fat mass (kg)          | 0.447<br><i>&lt;0.001</i> | 0.588<br><i>&lt;0.001</i> | 0.208<br><i>0.131</i>  | -0.456<br><i>&lt;0.001</i> | -0.117<br><i>0.367</i>    | -0.307<br><i>0.016</i>    | -0.531<br><i>&lt;0.001</i> |
| Body fat (%)           | 0.191<br><i>0.124</i>     | 0.239<br><i>0.082</i>     | 0.057<br><i>0.682</i>  | -0.037<br><i>0.797</i>     | -0.125<br><i>0.334</i>    | -0.349<br><i>0.006</i>    | -0.392<br><i>0.002</i>     |
| Trunk mass (kg)        | 0.548<br><i>&lt;0.001</i> | 0.588<br><i>&lt;0.001</i> | 0.345<br><i>0.011</i>  | -0.458<br><i>&lt;0.001</i> | -0.088<br><i>0.498</i>    | -0.251<br><i>0.051</i>    | -0.552<br><i>&lt;0.001</i> |
| Fasting FFA            | -0.138<br><i>0.300</i>    | 0.013<br><i>0.927</i>     | 0.042<br><i>0.775</i>  | 0.067<br><i>0.652</i>      | 0.161<br><i>0.240</i>     | 0.096<br><i>0.488</i>     | 0.057<br><i>0.688</i>      |
| FFA Suppression        | 0.211<br><i>0.112</i>     | 0.156<br><i>0.285</i>     | -0.331<br><i>0.022</i> | -0.263<br><i>0.071</i>     | 0.016<br><i>0.907</i>     | -0.015<br><i>0.913</i>    | -0.282<br><i>0.043</i>     |
| Fasting Insulin        | 0.188<br><i>0.129</i>     | 0.275<br><i>0.042</i>     | 0.270<br><i>0.048</i>  | -0.137<br><i>0.327</i>     | -0.348<br><i>0.005</i>    | -0.400<br><i>0.001</i>    | -0.443<br><i>&lt;0.001</i> |
| Steady State Insulin   | 0.168<br><i>0.175</i>     | 0.261<br><i>0.054</i>     | -0.220<br><i>0.109</i> | -0.302<br><i>0.028</i>     | -0.116<br><i>0.360</i>    | -0.118<br><i>0.353</i>    | -0.455<br><i>&lt;0.001</i> |
| Steady State C-Peptide | 0.122<br><i>0.345</i>     | 0.292<br><i>0.040</i>     | -0.217<br><i>0.134</i> | -0.439<br><i>0.002</i>     | -0.109<br><i>0.397</i>    | -0.084<br><i>0.518</i>    | -0.407<br><i>0.001</i>     |
| Raw M-value            | 0.050<br><i>0.689</i>     | -0.021<br><i>0.881</i>    | -0.378<br><i>0.005</i> | -0.189<br><i>0.176</i>     | 0.042<br><i>0.741</i>     | 0.103<br><i>0.423</i>     | -0.082<br><i>0.534</i>     |
| M/I                    | -0.133<br><i>0.286</i>    | -0.400<br><i>0.003</i>    | 0.067<br><i>0.632</i>  | 0.287<br><i>0.039</i>      | 0.250<br><i>0.048</i>     | 0.253<br><i>0.046</i>     | 0.414<br><i>&lt;0.001</i>  |
| DI                     | 0.023<br><i>0.857</i>     | -0.080<br><i>0.569</i>    | -0.343<br><i>0.013</i> | -0.063<br><i>0.662</i>     | 0.015<br><i>0.909</i>     | 0.087<br><i>0.501</i>     | -0.219<br><i>0.095</i>     |
| AI <sub>Rg</sub>       | 0.139<br><i>0.265</i>     | 0.066<br><i>0.638</i>     | -0.245<br><i>0.077</i> | -0.174<br><i>0.217</i>     | -0.089<br><i>0.489</i>    | -0.049<br><i>0.702</i>    | -0.401<br><i>0.001</i>     |
| ACPR <sub>g</sub>      | 0.167<br><i>0.198</i>     | 0.153<br><i>0.295</i>     | -0.255<br><i>0.080</i> | -0.327<br><i>0.025</i>     | -0.042<br><i>0.749</i>    | -0.003<br><i>0.983</i>    | -0.376<br><i>0.003</i>     |
| HbA1C (%)              | -0.033<br><i>0.787</i>    | 0.013<br><i>0.925</i>     | 0.421<br><i>0.001</i>  | 0.097<br><i>0.484</i>      | -0.165<br><i>0.185</i>    | -0.198<br><i>0.114</i>    | 0.162<br><i>0.209</i>      |
| Average cortex R2*     | -0.185<br><i>0.143</i>    | 0.001<br><i>0.992</i>     | -0.272<br><i>0.051</i> | 0.049<br><i>0.735</i>      | 1.000<br><i>&lt;0.001</i> | 0.575<br><i>&lt;0.001</i> | 0.095<br><i>0.462</i>      |
| Average medulla R2*    | -0.254                    | -0.142                    | -0.252                 | 0.118                      | 0.575                     | 1.000                     | 0.644                      |

|                      |              |              |              |              |                  |                  |                  |
|----------------------|--------------|--------------|--------------|--------------|------------------|------------------|------------------|
| Average FSOC medulla | <i>0.045</i> | <i>0.315</i> | <i>0.075</i> | <i>0.414</i> | <i>&lt;0.001</i> | <i>&lt;0.001</i> | <i>&lt;0.001</i> |
|                      | -0.290       | -0.341       | -0.167       | 0.308        | 0.095            | 0.644            | 1.000            |
|                      | <i>0.025</i> | <i>0.017</i> | <i>0.257</i> | <i>0.035</i> | <i>0.462</i>     | <i>&lt;0.001</i> | <i>&lt;0.001</i> |

Abbreviations: GFR, glomerular filtration rate; RPF, effective renal plasma flow;  $P_{GLO}$ , glomerular pressure; RVR, renal vascular resistance; FSOC, furosemide-induced suppression of oxygen consumption; FFA, free fatty acid; M/I, insulin sensitivity index (M-value/mean insulin concentration); DI, disposition index; AIRg, acute insulin response to glucose; ACPRg, acute C-peptide response to glucose; HbA1c, glycated hemoglobin.

### Supplemental Figure 1 Study design

Supplemental Figure 1

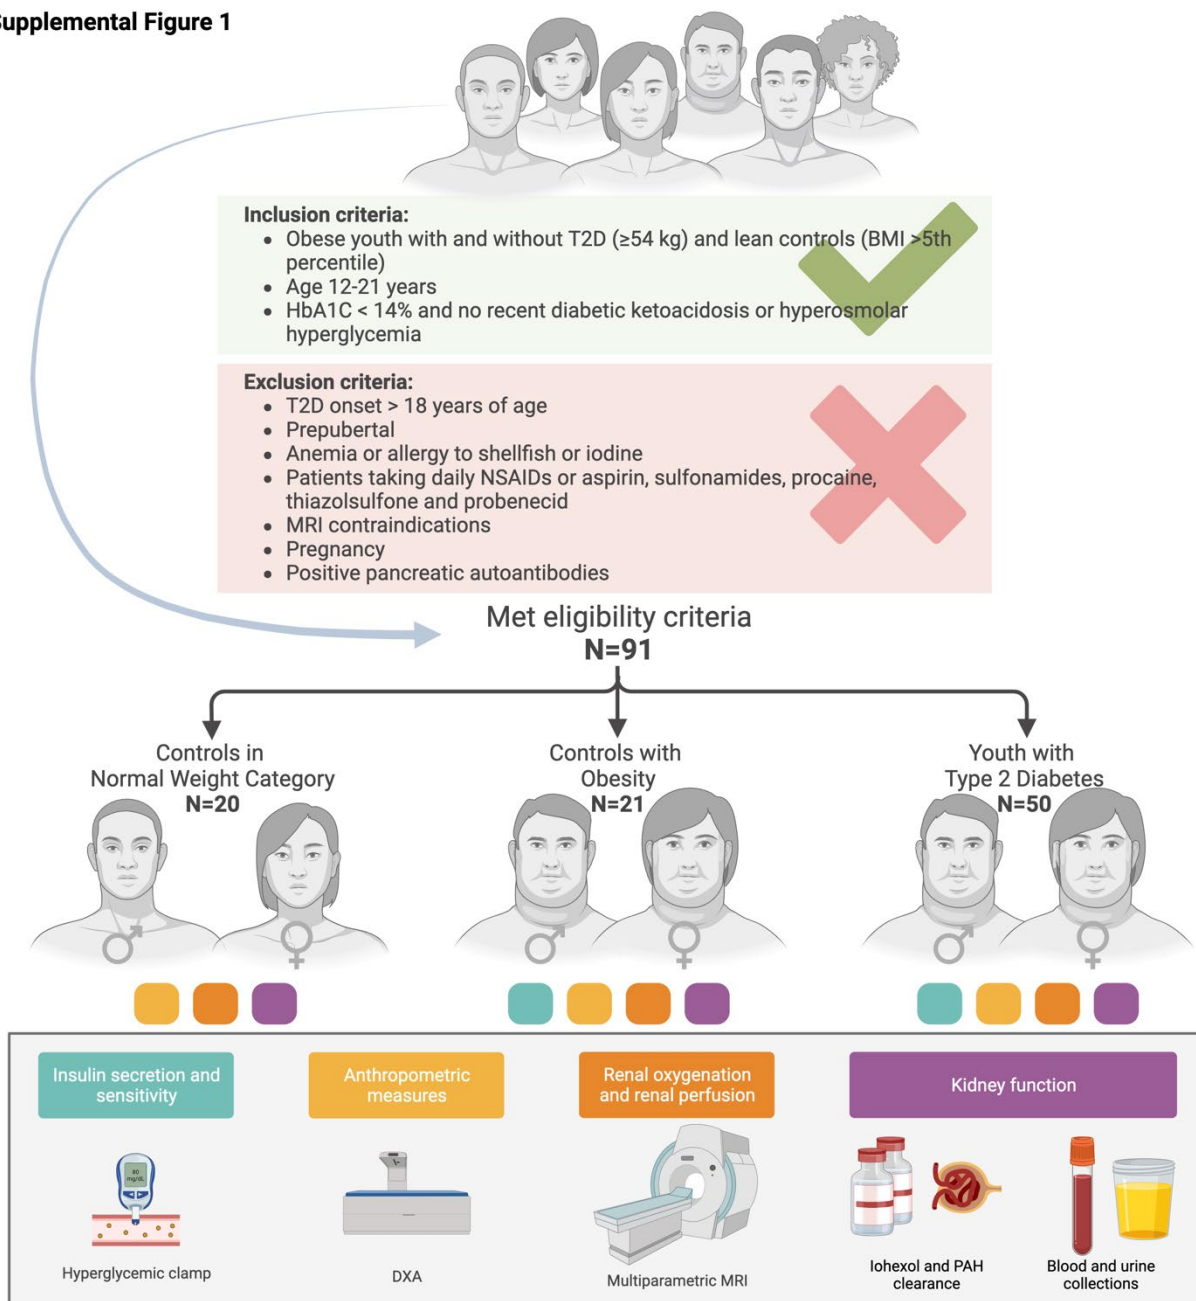

Supplemental Figure 2 Relationships between insulin secretion and insulin sensitivity in controls with obesity and youth with type 2 diabetes

## Supplemental Figure 2

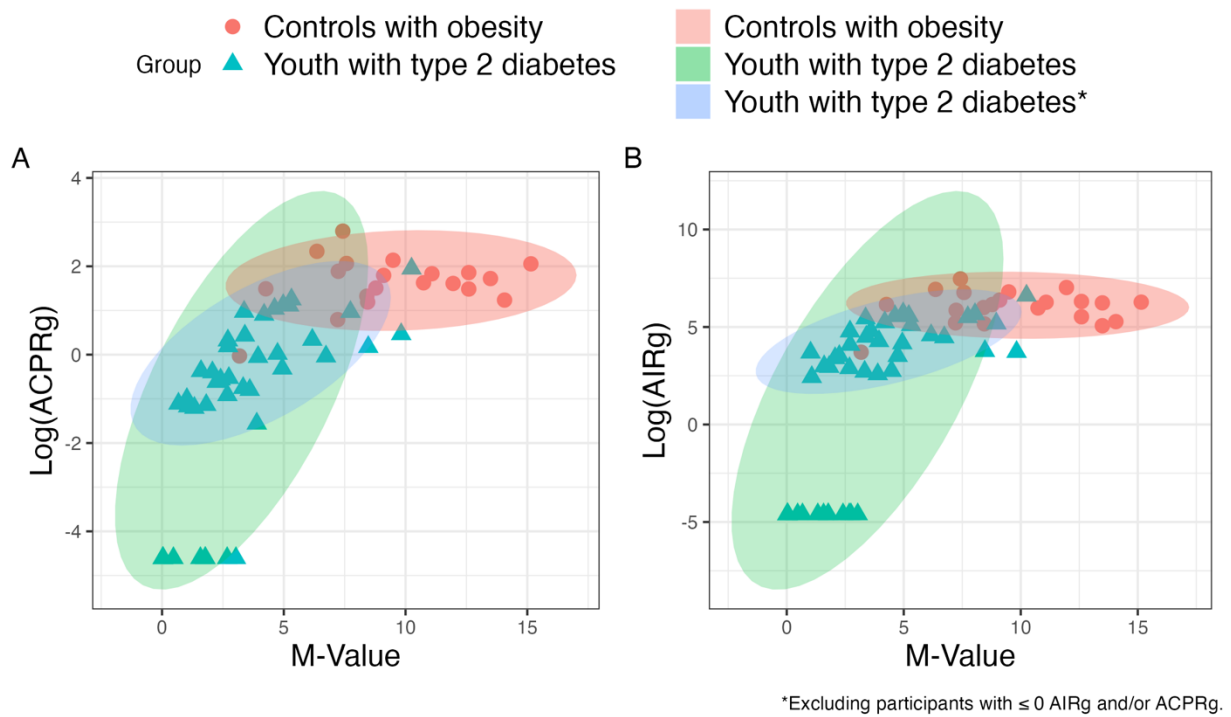

Illustration of relationships between insulin secretion and sensitivity in controls with obesity and youth with type 2 diabetes. Fifteen youth with type 2 diabetes exhibited near-zero AIRg and 8 youth with type 2 diabetes exhibited near-zero ACPRg and were included in the green ellipse. This subset of youths with type 2 diabetes showed negligible insulin and/or c-peptide responses to hyperglycemia, indicating severe  $\beta$ -cell dysfunction. The blue ellipse excludes these participants. Controls with obesity generally maintained consistent insulin secretion across a broad range of insulin sensitivities. In contrast, numerous youths with type 2 diabetes demonstrated both diminished insulin secretion and sensitivity.

Abbreviations: ACPRg, acute C-peptide response to glucose; AIRg, acute insulin response to glucose.



### Supplemental Figure 3 Visual illustration of intraglomerular hemodynamic function by group

Supplemental Figure 3

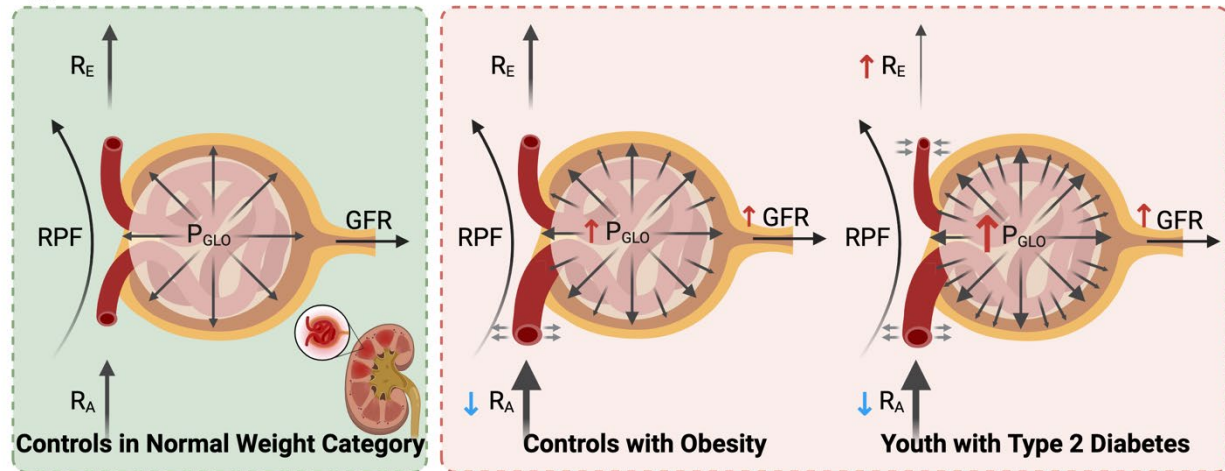

Healthy intraglomerular hemodynamic function shown in green box. Intraglomerular hemodynamic function for youth with obesity and type 2 diabetes illustrated based on study findings relative to controls in normal weight category. Up or down arrows indicate a significantly different measure compared to controls in normal weight category ( $p < 0.05$ ). Abbreviations: GFR, glomerular filtration rate; RPF, effective renal plasma flow;  $P_{GLO}$ , glomerular pressure;  $R_A$ , afferent arteriolar resistance;  $R_E$ , efferent arteriolar resistance.

# Supplemental Figure 4 Correlation between DXA measures and glomerular pressure, medulla R2\* and FSOC by group

Supplemental Figure 4

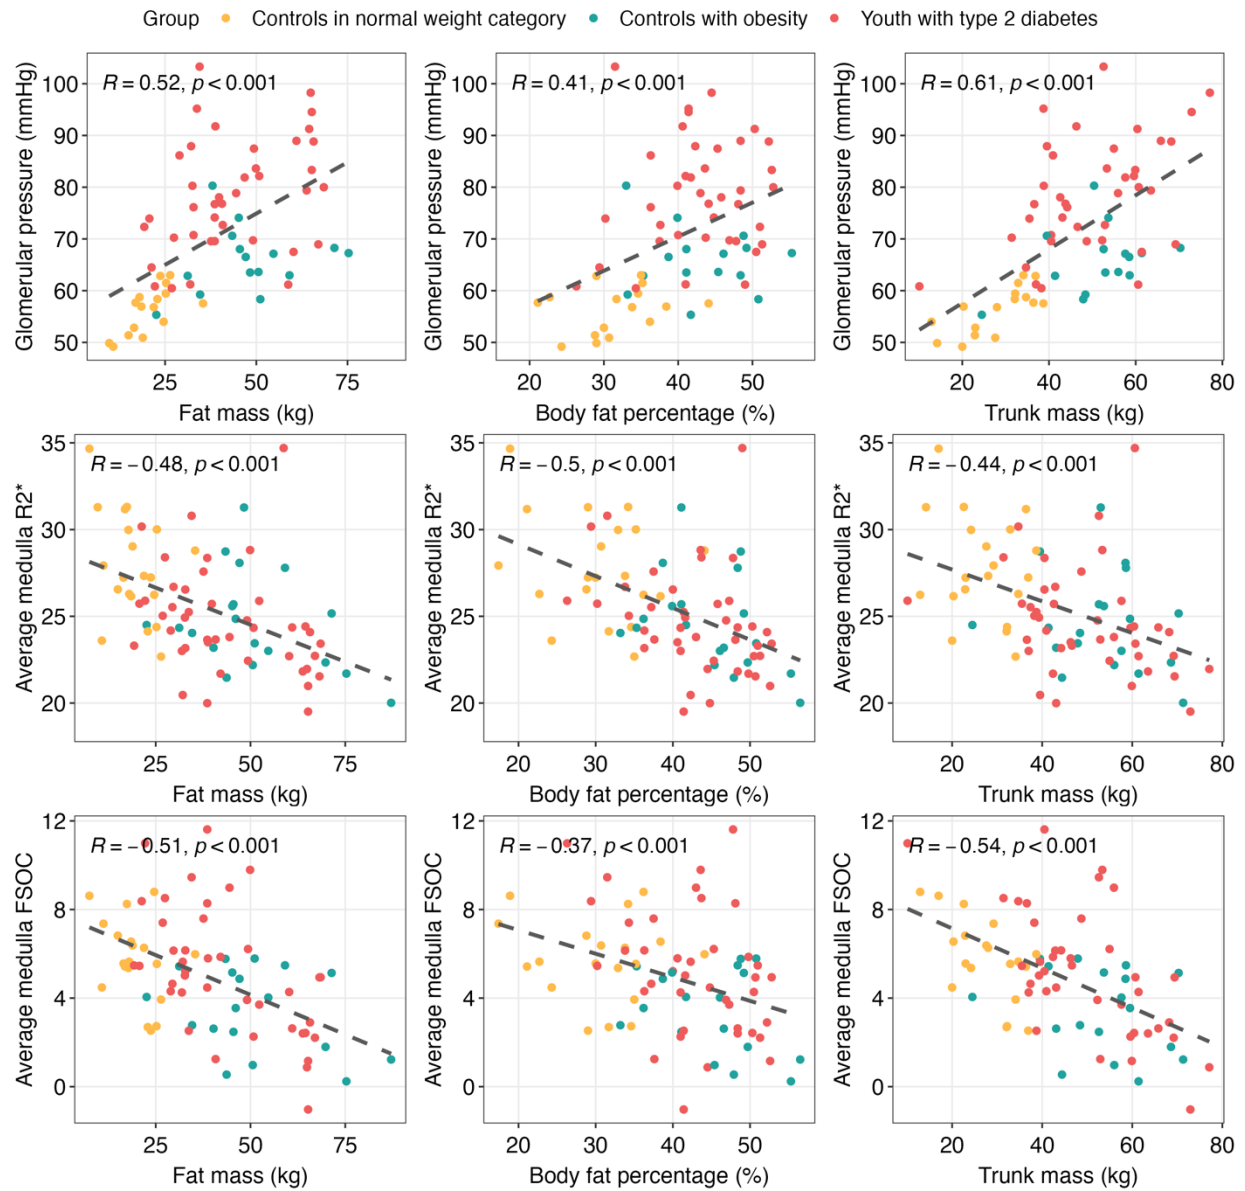

Abbreviations: DXA, dual-energy X-ray absorptiometry; FSOC, furosemide-induced suppression of oxygen consumption.

**Supplemental Figure 5 Correlation between DXA measures and GFR, DXA measures and RPF, trunk mass and glomerular pressure, glomerular pressure and insulin sensitivity, and FSOC and AIRg and ACPRg in youth with type 2 diabetes and obesity by groups**

**Supplemental Figure 5**

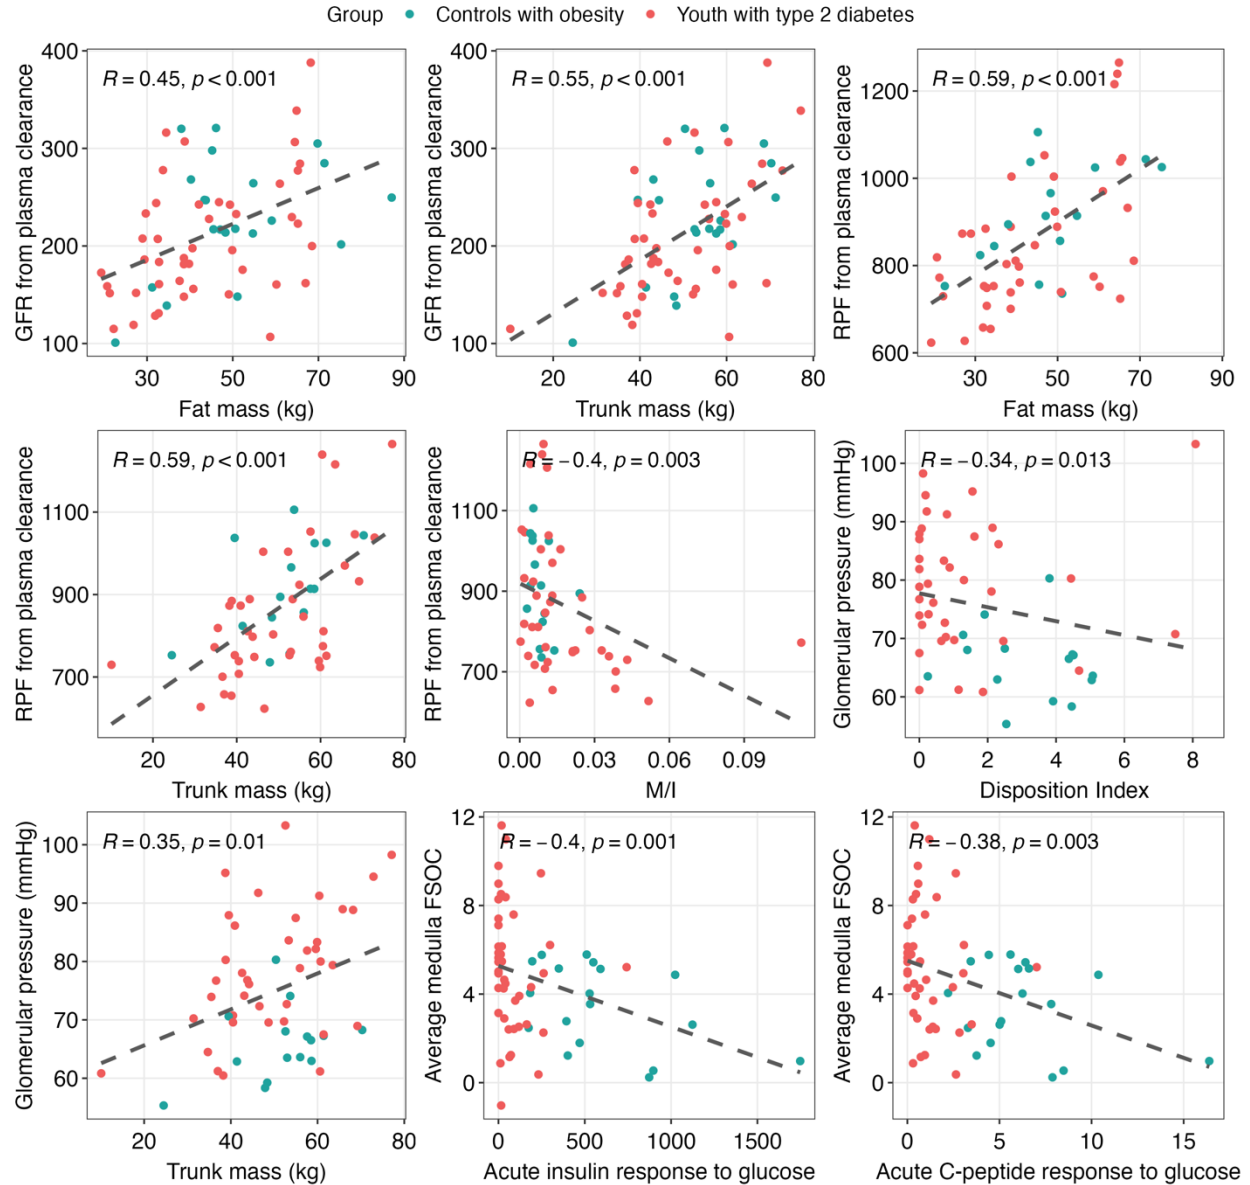

Abbreviations: GFR, glomerular filtration rate; RPF, effective renal plasma flow; FSOC, furosemide-induced suppression of oxygen consumption; FFA, free fatty acid; M/I, insulin sensitivity index (M-value/mean insulin concentration); DI, disposition index.
